1  
2  
3  
4  
5  
6  
7  
8  
9  
10  
11  
12  
13  
14  
15  
16  
17  
18  
19  
20  
21  
22  
23

The Impact of Alcohol Misuse in Trauma Patients: A Scoping Review Protocol

Authors: Chantae Garland<sup>1</sup>,Nhayan Abdulla<sup>1,2</sup>, Donghyun Lee<sup>1</sup>, Rae Spiwak<sup>1</sup>, Sarvesh Logsetty<sup>1</sup>, Jordan Nantais<sup>1,3,4\*</sup>

<sup>1</sup>Department of Surgery, Max Rady College of Medicine, University of Manitoba, Winnipeg, Manitoba, Canada

<sup>2</sup>Department of Surgery, McGill University, Montreal, Quebec, Canada

<sup>3</sup>Li Ka Shing Knowledge Institute, St Michael’s Hospital, Toronto, Ontario, Canada

<sup>4</sup>Institute of Medical Science, Temerty Faculty of Medicine, University of Toronto, Toronto, Ontario, Canada

\*Corresponding author: Jordan Nantais, Section of General Surgery, Department of Surgery, University of Manitoba, GF436B, 820 Sherbrook Street, R3K 0V6, Winnipeg, Manitoba, Canada.

Email: Jordan.nantais@mail.utoronto.ca

## 24 **Abstract**

### 25 Background

26 Alcohol use is a contributing factor in many cases of traumatic injury. There is conflicting evidence on  
27 the impact of alcohol use at the time of physical trauma on severity of injury and hospital course.  
28 Similarly, the significance of alcohol use disorder on outcomes in hospitalized trauma patients is unclear.  
29 This scoping review aims to provide a concise overview of the current literature surrounding peri-  
30 trauma alcohol use and alcohol use disorder on injury severity, in-hospital complications, patient  
31 outcomes, and long-term health impact of alcohol use in trauma. We will also explore the associated  
32 healthcare costs of this patient population.

### 33 Methods

34 A systematic search of the following databases MEDLINE, EMBASE, and Cochrane Library will be  
35 completed to extract all studies that meet our inclusion criteria from January 2000 onwards. Case  
36 reports will be excluded. Two reviewers will screen all citations, abstracts, and full text articles. A third  
37 reviewer will act as tiebreaker at each stage of the screening process. A narrative synthesis without  
38 meta-analysis will be conducted and assessed based on the Preferred Reporting Items for Systematic  
39 Reviews and Meta-Analyses extension for Scoping Reviews (PRISMA-ScR) guidelines.

### 40 Discussion

41 This review will contribute to the literature by providing a concise overview of the current data on the  
42 impact of alcohol on outcomes following trauma. We will explore the overall themes in the literature,  
43 limitations, and future directions to focus forthcoming research in this patient population.

### 44 Scoping review registration

45 Open Science Framework (<https://doi.org/10.17605/OSF.IO/Z84WK>)

46 Support

47 There were no funders or sponsors involved in the development of this protocol

48 Keywords

49 Alcohol use, substance misuse, trauma, traumatic injury, penetrating injury, blunt injury, motor vehicle  
50 collision (MVC), harmful drinking, mental outcome, physical outcome.

## 51 Introduction

52 Unintentional injuries were the 8<sup>th</sup> leading cause of hospitalization in Canada in the 2018/19 fiscal year  
53 and accounted for \$29.4 billion or \$80 million per day of healthcare costs as of 2021 [1]. Furthermore,  
54 these injuries are the third leading cause of death for Canadians, with the annual mortality rate rising  
55 from 27.4 per 100 000 population in 2001 to 47.2 per 100 000 in 2021 [1]. The impact of alcohol use in  
56 traumatic injury is not unique to Canada, and it plays a significant role on a global scale. Rates of alcohol-  
57 associated presentation to the emergency department (ED), defined as self-reported alcohol use and/or  
58 elevated blood alcohol concentration (BAC), have been reported to be as high as 20- 47% in the trauma  
59 population [2, 3, 4]. Alcohol has been so widely accepted as a significant reversible contributing factor  
60 to trauma that, in 2006, the American College of Surgeons Committee on Trauma introduced screening  
61 for problematic drinking as a requirement for designation as a level 1 or 2 trauma center and requires  
62 that all level 1 trauma centers provide an intervention for problem drinking [5].

63 Despite this apparent importance, the literature on the impact of alcohol on outcomes following trauma  
64 is limited and often contradictory. Some studies demonstrate that alcohol intoxication has a protective  
65 effect on injury; reporting decreased Injury Severity Scores (ISS), decreased mortality, shorter hospital  
66 length of stay (LOS), and fewer complications [5,6]. Conversely, other studies report increased ISS,  
67 increased rates of Intensive Care Unit (ICU) and ventilator days, and lower likelihood of discharge to

68 home [8,9]. The heterogeneity of literature on the topic is likely due to the difficulty of conducting high  
69 quality research on this patient population. Most literature is based on the retrospective review of  
70 trauma registries and is therefore subject to the limitations associated with this type of study design  
71 including: heterogeneity in definitions such as alcohol misuse; reliability of comprehensive records;  
72 differing study aims and outcomes; and confounding factors such as comorbidities.

73 A preliminary search of MEDLINE, the Cochrane Database of Systematic Reviews and JBI Evidence  
74 Synthesis was conducted and no current or underway systematic reviews or scoping reviews on the  
75 topic were identified.

76 Our study aims to provide a concise overview of the current literature surrounding alcohol exposure at  
77 the time of traumatic injury and alcohol use disorder on injury severity, in-hospital complications and  
78 mortality. We will also explore other outcomes including characterizing at-risk populations, the utility of  
79 brief motivational interviewing during hospital admission, long-term effects of alcohol use in trauma,  
80 and the financial burden on the healthcare system.

## 81 **Methods**

### 82 **Protocol and registration:**

83 This protocol has been registered with Open Science Framework  
84 (<https://doi.org/10.17605/OSF.IO/Z84WK>) and is being reported in accordance with the Preferred  
85 Reporting Items for Systematic Reviews and Meta-Analyses extension for Scoping Reviews (PRISMA-ScR)  
86 statement [10]. Any amendments to this protocol will be documented and published alongside the  
87 results of the scoping review.

### 88 **Eligibility criteria:**

## 89 **Inclusion criteria**

90 Our patient population will include adult patients, defined as age 15 years or older, who were admitted  
91 to a hospital for traumatic injuries occurring in the setting of acute alcohol intoxication or those who  
92 have a history of alcohol use disorder. The age limitation was decided based on the minimum legal  
93 drinking age of European countries included in the literature. Studies published since the year 2000 in  
94 English language from any country will be included, in keeping with similar evaluations of literature  
95 [11,12]. Experimental and quasi-experimental study designs including systematic reviews, randomized  
96 controlled trials, prospective and retrospective cohort studies, case-control, cross-sectional studies, and  
97 descriptive observational studies will be selected from the databases.

## 98 **Exclusion criteria**

99 Case reports or studies with full text articles that could not be accessed will be excluded. Patients with  
100 traumatic brain injury as their only injury will be excluded because there already exists a large database  
101 of literature including systematic reviews and meta-analyses on this specific patient population [13, 14].  
102 Literature with a study population consisting exclusively of the following cohorts will be excluded:  
103 military personnel, sexual assault victims, psychological trauma, burn patients, substance use without  
104 concomitant alcohol use, and self-harm. These narrow populations are not generalizable to the  
105 population presenting to trauma hospitals globally and therefore inclusion for the purpose of this  
106 scoping review may skew the results. Patients who were not admitted to the hospital, or where data  
107 was collected from police reports or autopsy data, will be excluded as they typically lack data regarding  
108 key clinical outcomes evaluated in our study. Similarly, we will exclude studies that do not report on at  
109 least one of the outcome measures below.

110

111 **Table 1. Scoping review inclusion and exclusion criteria**

| Inclusion Criteria                                                                                                                                                                                                                                                                                                                  | Exclusion Criteria                                                                                                                                                                                                                                                                                                                                                                                                                                                                                                                            |
|-------------------------------------------------------------------------------------------------------------------------------------------------------------------------------------------------------------------------------------------------------------------------------------------------------------------------------------|-----------------------------------------------------------------------------------------------------------------------------------------------------------------------------------------------------------------------------------------------------------------------------------------------------------------------------------------------------------------------------------------------------------------------------------------------------------------------------------------------------------------------------------------------|
| <ul style="list-style-type: none"><li>• Published in English language</li><li>• Age <math>\geq</math> 15 years</li><li>• Publication year <math>\geq</math> 2000</li><li>• Admitted to hospital due to a traumatic injury</li><li>• Injury associated with acute alcohol intoxication or history of alcohol use disorder.</li></ul> | <ul style="list-style-type: none"><li>• Case reports</li><li>• Studies where full text cannot be accessed</li><li>• TBI as only injury</li><li>• Patients not admitted to hospital</li><li>• Police reports only</li><li>• Autopsy data only</li><li>• Patient population that consists exclusively of:<ul style="list-style-type: none"><li>○ Military personnel</li><li>○ Sexual assault victims</li><li>○ Psychological trauma</li><li>○ Burn patients</li><li>○ Non-alcohol related substance use</li><li>○ Self-harm</li></ul></li></ul> |

112

## 113 **Outcome measures:**

114 We will evaluate studies with at least one of the following clinical outcomes: mortality; Injury Severity  
115 Score; surgery as a result of injury; in-hospital complications; resource use; long term functional impact;  
116 and psychological or abstinence-based interventions. This selection is in keeping with outcomes  
117 encountered in existing trauma literature [16, 17, 19]. In-hospital complications are defined as harmful  
118 events or negative outcomes occurring during inpatient hospitalization that occur during the processes  
119 of care and treatment rather than the natural progression of diseases as well as any complication that is  
120 listed as such by the respective publication [16,18]. These can include but are not limited to: cardiac  
121 arrest; arrhythmia; sepsis; multiorgan failure; pneumonia; respiratory distress; pulmonary embolism;  
122 seizures; delirium; and hepatic failure [16, 17]. Demographics, when available, will be evaluated (mean  
123 age, gender, ethnicity, socioeconomic status, injury type and mechanism). Resource use will be defined  
124 as any of the following: hospital length of stay (LOS); intensive care unit (ICU) LOS; healthcare costs; and

125 propensity to leave against medical advice [16]. Long term functional impact is defined as any of the  
126 following: trauma recidivism; discharge disposition; likelihood of return to work; financial burden; and  
127 psychological or substance use disorders after admission [19]. Preventative measures taken at the time  
128 of admission for prevention of psychological harm, risk reduction, and mitigation of substance abuse will  
129 also be discussed [20].

## 130 **Search strategy:**

131 A structured search of the following electronic databases (from January 2000 onwards) will be  
132 undertaken including MEDLINE, Cochrane Library, EMBASE via OVID, SCOPUS, and CINAHL. The  
133 following keywords will be used: (injuries or wounds or trauma or traumas or wound or contusion or  
134 bruises or accident or MVC or penetrating or blunt or GSW) AND (alcohol\* or binge drinking\* or  
135 substance abuse\* or ETOH or BAC or blood alcohol level or intoxication or substance misuse\* or AWS or  
136 ethanol abuse) AND (acute care or level one trauma or trauma centre or trauma center or hospitaliz\* or  
137 emergency department or emergency ward or ER or emergency room or emergency unit or intensive  
138 care unit or ICU or in-hospital).

## 139 **Data selection and screening process:**

140 Covidence will be used to manage records and data throughout the review [11]. Duplicates will be  
141 removed using this software. Following a pilot test of ten percent of the database, abstracts will be  
142 independently screened by two reviewers (DL, CG) for assessment against the inclusion criteria. In cases  
143 where decisions for inclusion/exclusion are discordant, the principal investigator will act as the  
144 tiebreaker (JN). Full-text copies of the studies will be retrieved and independently reviewed by two  
145 authors (DL, CG) to ensure inclusion/exclusion criteria are met. Excluded articles or articles requiring  
146 further consensus will be reviewed and discussed with the principal investigator (JN). Reasons for the

147 exclusion of sources of evidence will be recorded in full in the final scoping review and presented in a  
148 PRISMA-ScR flow diagram.

## 149 **Data extraction, evaluation, and synthesis:**

150 A data extraction table will be designed to record relevant information from each study including:  
151 author; study; year of publication; population; study design; objective; results; conclusions; limitations;  
152 and odds ratios for quantitative outcomes (Fig 1). This table will be piloted by two authors (DL, CG) using  
153 ten percent of the full text articles and reviewed with the research team before proceeding with the rest  
154 of the data extraction. Any inconsistencies in data extraction or changes required to the charting table  
155 between authors will be discussed and resolved prior to proceeding to ensure accuracy and  
156 cohesiveness between data collectors. The remainder of the data extraction will be done and recorded  
157 independently by one of the two authors conducting the initial reviews (DL, CG). Following data  
158 extraction, the table will be reorganized, and articles will be grouped based on similar study designs and  
159 outcomes. The completed table will be included as an appendix to our final scoping review.

### 160 **Figure 1: Data extraction table**

161 Due to the expected variability of the reporting of outcomes, a meta-analysis will not be performed. The  
162 data will instead be analyzed based on Synthesis Without Meta-analysis (SWiM) and Enhancing  
163 transparency in reporting the synthesis of qualitative research (ENTREQ) guidelines [21,22]. We will  
164 summarize findings for each outcome reported by at least 2-3 papers in a narrative format. Where  
165 appropriate a Grading of Recommendations Assessment, Development and Evaluation (GRADE) score  
166 will be applied to the summary of outcomes [23]. Due to the nature of a scoping review and expected  
167 lack of high quality (prospective studies, randomized controlled trials) there will be no formal risk of bias

168 assessment however limitations to included studies will be recorded on an outcome level within the

169 discussion and study level within the data extraction table.

170

171

## 172 **Discussion**

173 This review is designed to evaluate the current body of literature on alcohol involvement in outcomes  
174 after trauma. We expect it will also provide information about the impact of alcohol on at-risk  
175 demographics, healthcare utilization, discharge disposition, and the physical and psychological impact of  
176 trauma. Individual studies may be limited by small patient populations, single institutional data, risk of  
177 bias, and primarily retrospective study designs making it difficult to come to strong evidence-based  
178 conclusions. The intention of our scoping review is to observe the trend and limitations in the literature  
179 for this patient population, identify gaps in the existing literature and inform future work on this  
180 important and highly relevant patient population.

## 181 **Acknowledgements**

182 We would like to thank University of Manitoba librarian Carole Cook for assisting with our literature  
183 search strategy as well as research assistant Brenda Comaskey for reviewing and editing this protocol  
184 article.

## 185 References

- 186 1. Statistics Canada. Quick facts on injury and poisoning. 2022. Available from:  
187 <https://www.canada.ca/en/public-health/services/injury-prevention/facts-on-injury.html>
- 188 2. Hoonpongsimanont W, Ghanem G, Sahota P, Arif A, Barrios C, Saadat S, Lotfipour S. Association  
189 of blood alcohol and alcohol use disorders with emergency department disposition of trauma  
190 patients. *Western Journal of Emergency Medicine*. 2022 Mar;23(2):158.
- 191 3. Soderstrom CA, Trifillis AL, Shankar BS, Clark WE, Cowley RA. Marijuana and alcohol use among  
192 1023 trauma patients: a prospective study. *Archives of Surgery*. 1988 Jun 1;123(6):733-7.
- 193 4. Rivara FP, Jurkovich GJ, Gurney JG, Seguin D, Fligner CL, Ries R, Raisys VA, Copass M. The  
194 magnitude of acute and chronic alcohol abuse in trauma patients. *Archives of Surgery*. 1993 Aug  
195 1;128(8):907-13.
- 196 5. Committee on Trauma, American College of Surgeons. Resources for Optimal Care of the Injured  
197 Patient (2022 Standards). 2022. Available from: [https://www.facs.org/quality-](https://www.facs.org/quality-programs/trauma/quality/verification-review-and-consultation-program/standards/2022-resources-repository/access/)  
198 [programs/trauma/quality/verification-review-and-consultation-program/standards/2022-](https://www.facs.org/quality-programs/trauma/quality/verification-review-and-consultation-program/standards/2022-resources-repository/access/)  
199 [resources-repository/access/](https://www.facs.org/quality-programs/trauma/quality/verification-review-and-consultation-program/standards/2022-resources-repository/access/)
- 200 6. Liou DZ, Barmparas G, Zaw A, Bukur M, Salim A, Ley EJ. Alcohol intoxication may be associated  
201 with reduced truncal injuries after blunt trauma. *The American Journal of Surgery*. 2015 Jul  
202 1;210(1):87-92.
- 203 7. Albrecht-Anoschenko J, Uhl E, Gilsbach JM, Kreitschmann-Andermahr I, Rohde V. Head injury  
204 after a fall on stairs: poorer prognosis in inebriated patients?. *Zentralblatt für Neurochirurgie*.  
205 2005 May;66(02):59-62.
- 206 8. Hsieh CH, Su LT, Wang YC, Fu CY, Lo HC, Lin CH. Does alcohol intoxication protect patients from  
207 severe injury and reduce hospital mortality? The association of alcohol consumption with the  
208 severity of injury and survival in trauma patients. *The American Surgeon*. 2013 Dec;79(12):1289-  
209 94.
- 210 9. Salottolo K, McGuire E, Mains CW, van Doorn EC, Bar-Or D. Occurrence, predictors, and  
211 prognosis of alcohol withdrawal syndrome and delirium tremens following traumatic injury.  
212 *Critical Care Medicine*. 2017 May 1;45(5):867-74.
- 213 10. Tricco AC, Lillie E, Zarin W, O'Brien KK, Colquhoun H, Levac D, Moher D, Peters MD, Horsley T,  
214 Weeks L, Hempel S. PRISMA extension for scoping reviews (PRISMA-ScR): checklist and  
215 explanation. *Annals of Internal Medicine*. 2018 Oct 2;169(7):467-73.
- 216 11. Veritas Health Innovation. Covidence systematic review software. Melbourne; 2019. Available  
217 from: <https://www.covidence.org>.
- 218 12. Courtenay M, Nancarrow S, Dawson D. Interprofessional teamwork in the trauma setting: a  
219 scoping review. *Human Resources for Health*. 2013 Dec;11:1-0.
- 220 13. Taylor LA, Kreutzer JS, Demm SR, Meade MA. Traumatic brain injury and substance abuse: A  
221 review and analysis of the literature. *Neuropsychological Rehabilitation*. 2003 Jan 1;13(1-2):165-  
222 88.
- 223 14. De Guise E, Leblanc J, Dagher J, Lamoureux J, Jishi AA, Maleki M, Marcoux J, Feyz M. Early  
224 outcome in patients with traumatic brain injury, pre-injury alcohol abuse and intoxication at  
225 time of injury. *Brain Injury*. 2009 Jan 1;23(11):853-65.

- 226 15. Mikhail JN, Nemeth LS, Mueller M, Pope C, NeSmith EG. The social determinants of trauma: a  
227 trauma disparities scoping review and framework. *Journal of Trauma Nursing | JTN*. 2018 Sep  
228 1;25(5):266-81.
- 229 16. Moore L, Stelfox HT, Boutin A, Turgeon AF. Trauma center performance indicators for nonfatal  
230 outcomes: a scoping review of the literature. *Journal of Trauma and Acute Care Surgery*. 2013  
231 May 1;74(5):1331-43.
- 232 17. Salottolo, K., McGuire, E., Mains, C.W., van Doorn, E.C. and Bar-Or, D. Occurrence, predictors,  
233 and prognosis of alcohol withdrawal syndrome and delirium tremens following traumatic injury.  
234 *Critical Care Medicine*. 2017;45(5):867-874.
- 235 18. Peng MM, Kurtz S, Johannes RS. Adverse outcomes from hospital-acquired infection in  
236 Pennsylvania cannot be attributed to increased risk on admission. *American Journal of Medical*  
237 *Quality*. 2006 Nov;21(6\_suppl):17S-28S.
- 238 19. Van Ditschuijzen JC, Van den Driessche CR, Sewalt CA, Van Lieshout EM, Verhofstad MH, Den  
239 Hartog D. The association between level of trauma care and clinical outcome measures: a  
240 systematic review and meta-analysis. *Journal of Trauma and Acute Care Surgery*. 2020 Oct  
241 1;89(4):801-12.
- 242 20. Kohler S, Hofmann A. Can motivational interviewing in emergency care reduce alcohol  
243 consumption in young people? A systematic review and meta-analysis. *Alcohol and Alcoholism*.  
244 2015 Mar 1;50(2):107-17.
- 245 21. Campbell M, McKenzie JE, Sowden A, Katikireddi SV, Brennan SE, Ellis S, Hartmann-Boyce J, Ryan  
246 R, Shepperd S, Thomas J, Welch V. Synthesis without meta-analysis (SWiM) in systematic  
247 reviews: reporting guideline. *BMJ*. 2020 Jan 16;368.
- 248 22. Tong A, Flemming K, McInnes E, Oliver S, Craig J. Enhancing transparency in reporting the  
249 synthesis of qualitative research: ENTREQ. *BMC Medical Research Methodology*. 2012  
250 Dec;12(1):1-8.
- 251 23. Guyatt GH, Oxman AD, Vist GE, Kunz R, Falck-Ytter Y, Alonso-Coello P, Schünemann HJ. GRADE:  
252 an emerging consensus on rating quality of evidence and strength of recommendations. *BMJ*.  
253 2008 Apr 24;336(7650):924-6.
- 254

255 **Figure Legend**

256 **Figure 1: Data extraction table.**

| Author                                      | Study Name                                                                                     | Year | Population & Study Design                                                                  | Objective                                                        | Results                                                                                                                                                                                               | Conclusions & Odds ratio                                                                                                                                                          | Limitations                                                                                                                                     |
|---------------------------------------------|------------------------------------------------------------------------------------------------|------|--------------------------------------------------------------------------------------------|------------------------------------------------------------------|-------------------------------------------------------------------------------------------------------------------------------------------------------------------------------------------------------|-----------------------------------------------------------------------------------------------------------------------------------------------------------------------------------|-------------------------------------------------------------------------------------------------------------------------------------------------|
| L Moore, HT<br>Stelfox, A<br>Boutin, et al. | Trauma centre performance indicators for nonfatal outcomes: A scoping review of the literature | 2013 | Scoping review<br>Human studies from high income countries from earliest date to July 2011 | To evaluate the level of research on nonfatal outcomes in trauma | 14 non fatal outcomes identified from 40 included studies. These include adverse events, missed injuries, reintubation, ICU days, unplanned surgeries, HLOS, readmissions, functional capacity/ ADLs. | Adverse events and resource use were frequently used to evaluate trauma care, readmissions and function in daily activities were rarely used, and quality of life was never used. | Population limited to North America, Europe, & Australia. Studies may have been missed in data collection. Missing information in publications. |

Figure 1: Data extraction table
